# Supplementary material for: Licochalcone E, a β-Amyloid Aggregation Inhibitor, Regulates Microglial M1/M2 Polarization via Inhibition of CTL1-Mediated Choline Uptake
Source: MDPI journal article supplement (doi:10.3390/biom13020191), 2023-01-17
Supplement: s1 [file s1]

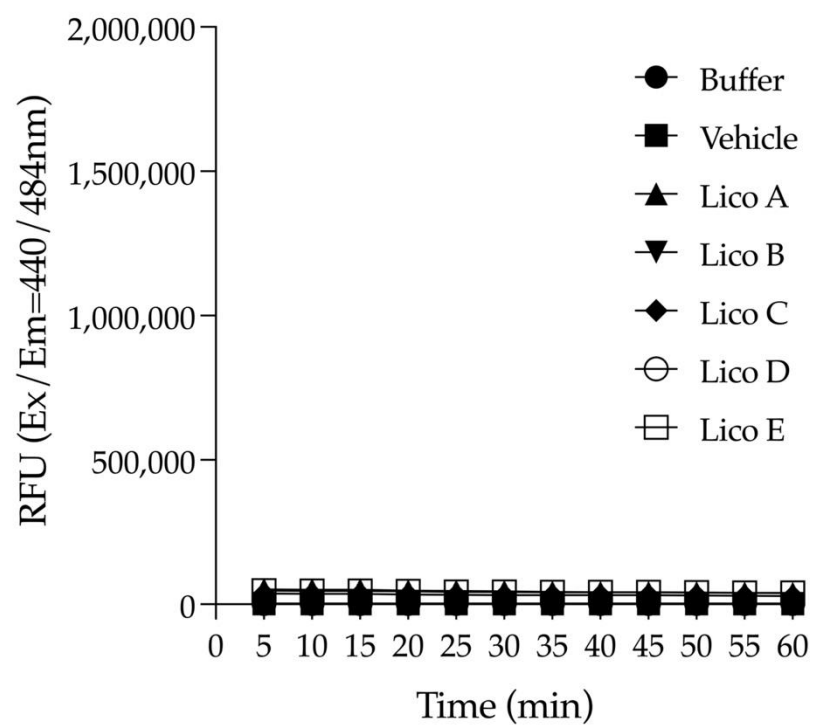

**Figure S1.** Effect of 100  $\mu$ M Licos A-E on relative fluorescence intensity at Ex440nm/Em484nm.

Lico A  
(100  $\mu$ M)

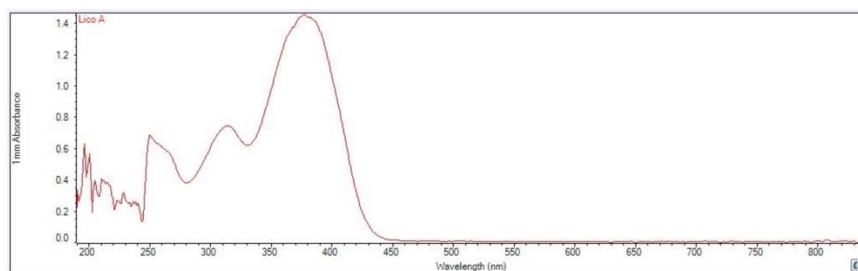

Lico B  
(100  $\mu$ M)

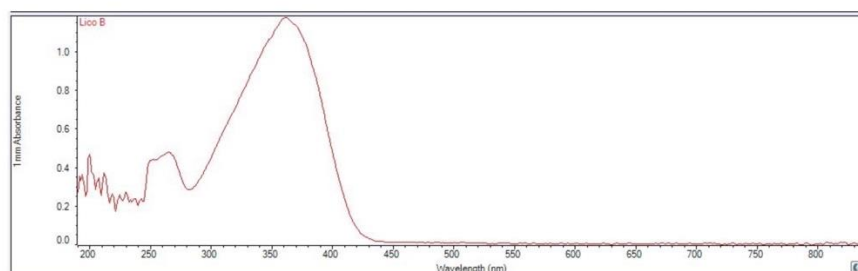

Lico C  
(100  $\mu$ M)

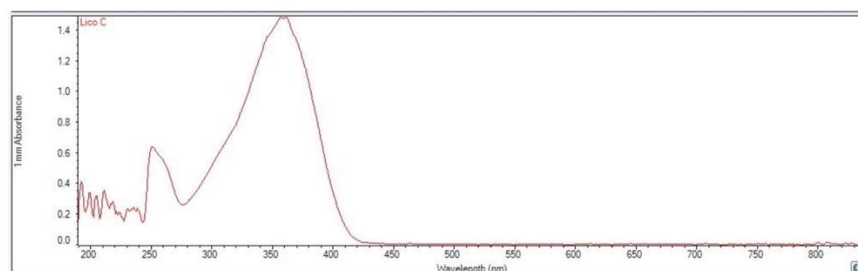

Lico D  
(100  $\mu$ M)

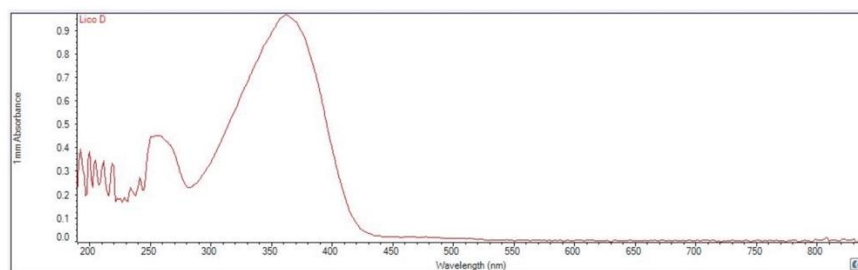

Lico E  
(100  $\mu$ M)

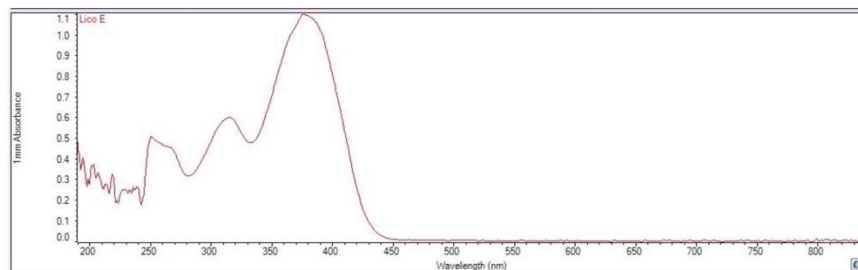

**Figure S2.** UV-vis spectra of 100  $\mu$ M Licos A-E.

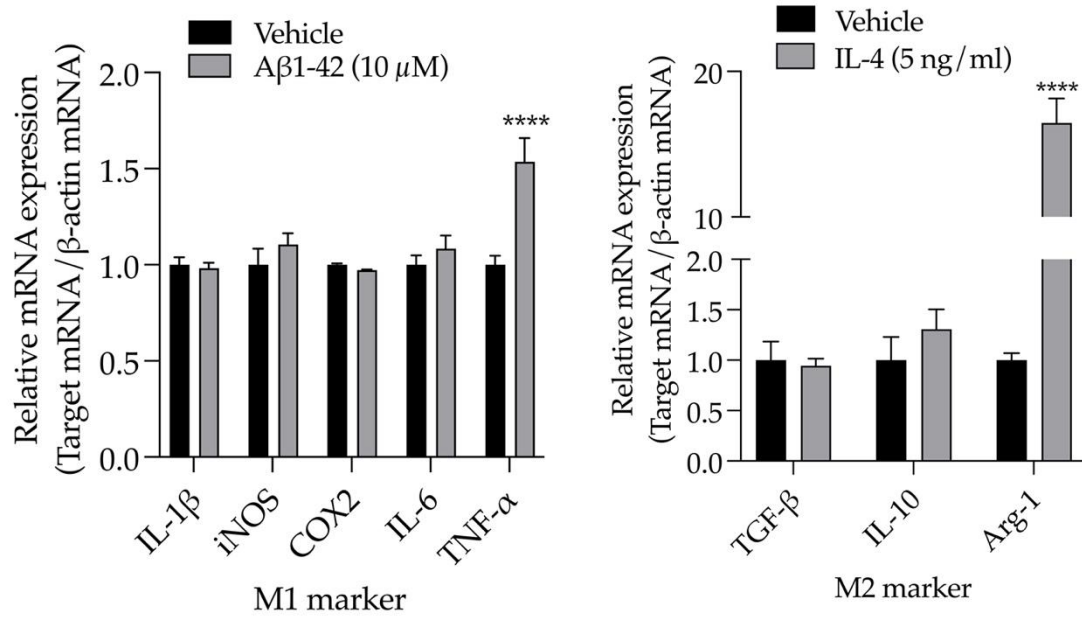

**Figure S3.** Expression of mRNAs for M1 and M2 markers after stimulation with A $\beta$ -1-42 and IL-4 for 4h. \*\*\*\*p<0.0001 compared with vehicle control.
